# Supplementary material for: Mesoscopic surface roughness of ice crystals pervasive across a wide range of ice crystal conditions
Source: Copernicus journal article supplement (doi:10.5194/acp-14-12357-2014), 2014-11-25
Supplement: Supplementary file 1 [file acp-14-12357-2014-supplement.zip]

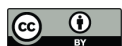

## *Supplement of*

# **Mesoscopic surface roughness of ice crystals pervasive across a wide range of ice crystal conditions**

**N. B. Magee et al.**

*Correspondence to:* N. B. Magee (magee@tcnj.com)

- `acp-14-12357-2014-supplement-cover-letter.tex`
- `Basal_roughness_layers.mp4`
- `GrowAndSublime.mp4`
- `ImpactWave.mp4`
- `Inhibited1.mp4`
- `Inhibited2-20x.mp4`
- `Inhibited3-20x.mp4`
- `SingleCrystal.mp4`
